# Supplementary material
Source: PubMed Central journal article supplement (PMC3847565)
Supplement: cr2013113x1.pdf [file cr2013113x1.pdf]

---

**Supplementary Figure 1** Deletion of mouse *mIno80* gene. **(A)** Sequencing results of cDNAs from RNA isolated from *mIno80<sup>F/F</sup>* MEFs infected with adenovirus containing empty vector (Ad-E) or Cre recombinase (Ad-Cre). Complete deletion of exon 3 (red lettering) and exon 4 (blue lettering) are shown as dotted lines after Cre-mediated *mIno80* gene recombination. **(B)** Schematic protein domain structure of mouse mIno80 (accession number NP\_080850.2) and predicted protein sequence of the partial mIno80 peptide after *mIno80* gene targeting. The predicted 52 amino acid mIno80 peptide after deletion of the *mIno80* gene will be out of frame. The conserved domains of mIno80 are shown: HSA, HSA/PTH domain; Snf2N, Snf2 family N terminus; Helic C, helicase superfamily C terminus. Numbers refer to positions in the amino acid sequence of the mIno80 protein. **(C)** Representative image of uterus isolated from a *mIno80<sup>+/-</sup>* female mouse. Left image: numbers refer to individually implanted embryos. Embryos 2 and 3 were small and the genotyping revealed that they were *mIno80<sup>-/-</sup>*. Right images: isolated *mIno80<sup>+/+</sup>* and *mIno80<sup>-/-</sup>* embryos at E10.5 showing defective morphology in *mIno80<sup>-/-</sup>* embryos (em, embryonic structure; exem, extra-embryonic structure).
