# Supplementary material
Source: PubMed Central journal article supplement (PMC3847565)
Supplement: cr2013113x2.pdf [file cr2013113x2.pdf]

**A**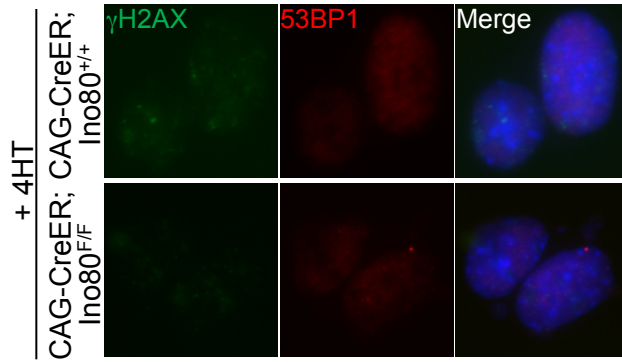**B**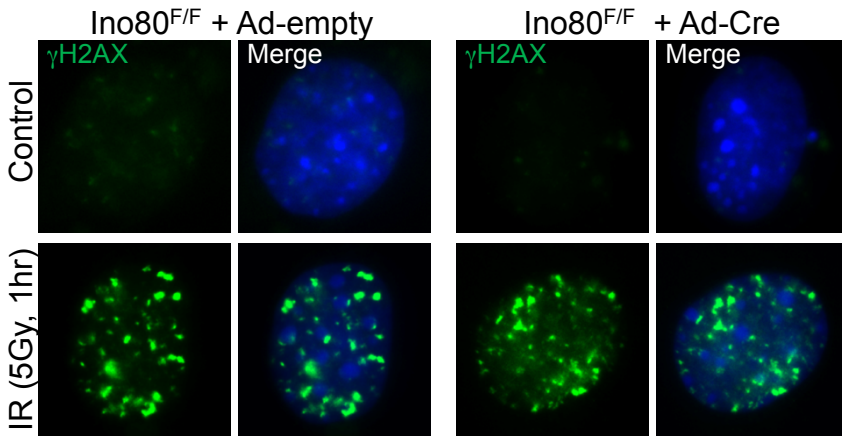**C**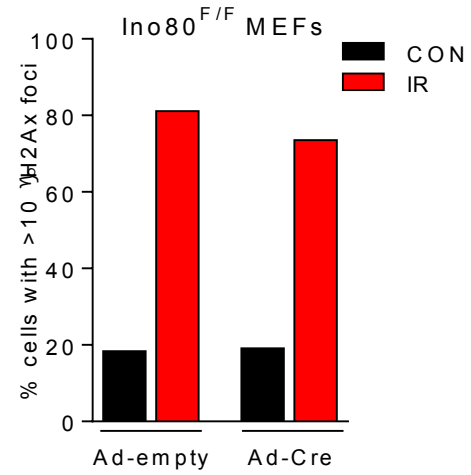**D**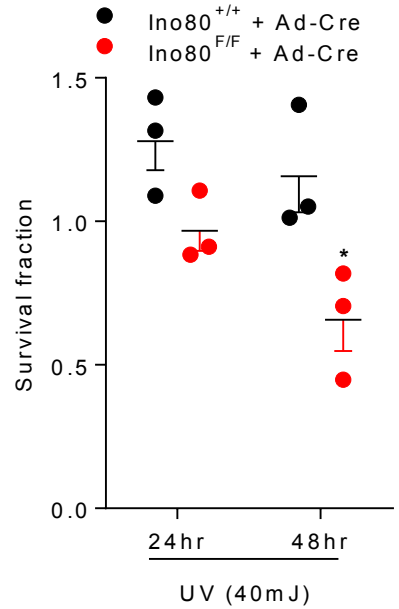

---

**Supplementary Figure 2** DNA damage foci are present in *mIno80* deleted cells. **(A)**

Immunostaining for  $\gamma$ -H2AX and 53BP1-positive DNA damage foci in *CAG-CreER; mIno80<sup>+/+</sup>* or *CAG-CreER; mIno80<sup>F/F</sup>* MEFs after treatment with 4-HT for 3 days. **(B)** Immunostaining for

$\gamma$ -H2AX in *mIno80<sup>F/F</sup>* MEFs infected with Ad-empty or Ad-Cre before subjecting to 5 Gy IR

exposure. **(C)** Quantification of **(B)** for percent of cells with more than 10  $\gamma$ -H2AX foci. **(D)**

Survival fraction of *mIno80<sup>F/F</sup>* and *mIno80<sup>+/+</sup>* MEFs expressing Ad-Cre, measured by the MTT assay at different time after UV irradiation (40mJ). Survival fraction was normalized to cells not exposed to UV.
