# Supplementary material
Source: PubMed Central journal article supplement (PMC3847565)
Supplement: cr2013113x3.pdf [file cr2013113x3.pdf]

**A**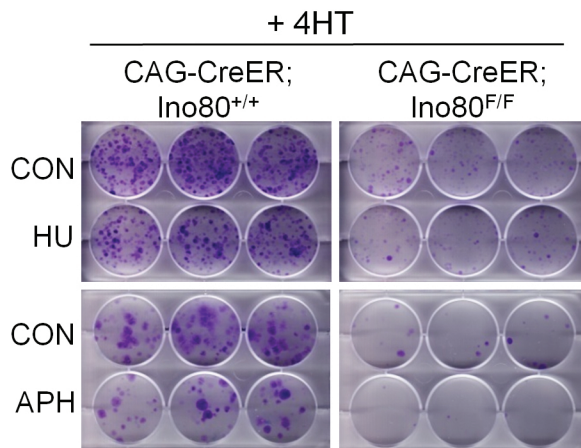**B**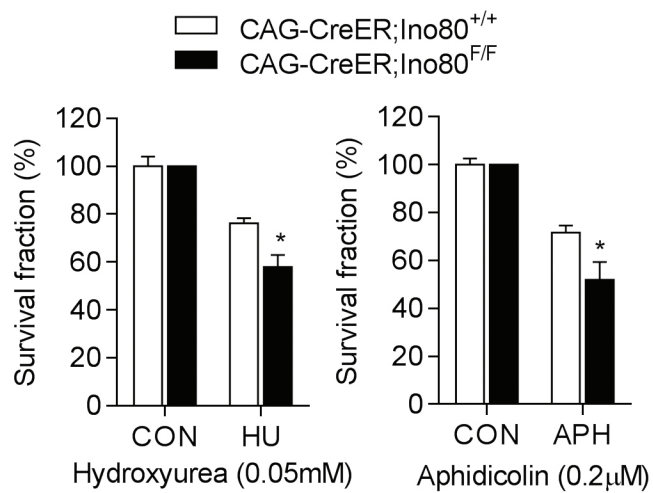

---

**Supplementary Figure 3 (A)** Representative colony forming assays of 4-HT treated *CAG-CreER; mIno80<sup>+/+</sup>* and *CAG-CreER; mIno80<sup>F/F</sup>* MEFs following exposure to 0.2 $\mu$ M aphidicolin (APH) or 0.05mM hydroxyurea for 24hrs. Colonies were fixed and stained at 5 days after treatment with HU and APH. **(B)** Quantification of **(A)** from two independent experiments. Error bars represent s.e.m. and asterisks indicate statistically significant differences (\*  $p < 0.05$ , Student's *t*-test).
