# Supplementary material
Source: PubMed Central journal article supplement (PMC3847565)
Supplement: cr2013113x6.pdf [file cr2013113x6.pdf]

A

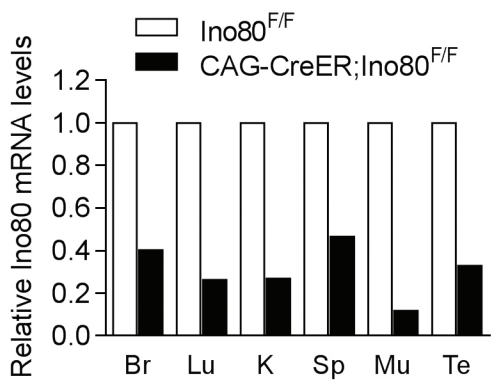

|             | Relative Ino80 mRNA level (%) |
|-------------|-------------------------------|
| Brain (Br)  | 40.2393                       |
| Lung (Lu)   | 26.2599                       |
| Kidney (K)  | 26.8728                       |
| Spleen (Sp) | 46.5407                       |
| Muscle (Mu) | 11.7952                       |
| Testis (Te) | 32.9455                       |

B

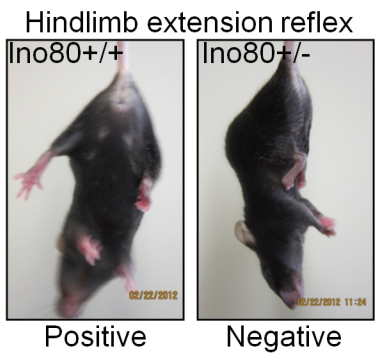

C

|        | Ino80 genotype | % reflex negative |
|--------|----------------|-------------------|
| Male   | +/+            | 11.11             |
|        | +/-            | 16.00             |
| Female | +/+            | 0.00              |
|        | +/-            | 25.00             |
| total  | +/+            | 4.00              |
|        | +/-            | 21.31             |

D

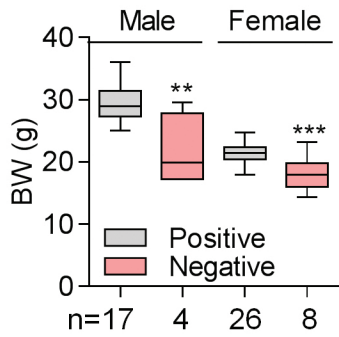

E

|                       | Ino80 <sup>+/+</sup> p53 <sup>+/-</sup> | Ino80 <sup>+/+</sup> p53 <sup>-/-</sup> | Ino80 <sup>+/-</sup> p53 <sup>+/-</sup> | Ino80 <sup>+/-</sup> p53 <sup>-/-</sup> | Ino80 <sup>-/-</sup> p53 <sup>+/-</sup> | Ino80 <sup>-/-</sup> p53 <sup>-/-</sup> | Total |
|-----------------------|-----------------------------------------|-----------------------------------------|-----------------------------------------|-----------------------------------------|-----------------------------------------|-----------------------------------------|-------|
| Number of mice at P21 | 10                                      | 12                                      | 21                                      | 19                                      | 0                                       | 0                                       | 62    |
| % (expected %)        | 16.1 (12.5)                             | 19.4 (12.5)                             | 33.9 (25)                               | 30.6 (25)                               | 0 (12.5)                                | 0 (12.5)                                | 100%  |

---

**Supplementary Figure 6** Phenotype of *mIno80* heterozygote mice. **(A)** Real-time PCR analysis for *mIno80* mRNA expression levels in various tissues isolated from *CAG-CreER; mIno80<sup>F/F</sup>* mice following intraperitoneal tamoxifen injection. Values are normalized to GAPDH expression levels. **(B)** Representative images of *mIno80<sup>+/+</sup>* mice with normal (positive) or abnormal (negative) hind limb extension reflex. **(C)** Summary of the number and percentile of *mIno80<sup>+/-</sup>* mice with a negative extension reflex phenotype. **(D)** Comparison of body weights in *mIno80<sup>+/-</sup>* mice with positive or negative extension reflex phenotype at 12 weeks of age. Error bars represent s.e.m. (\*\*,  $p < 0.005$ ; \*\*\*,  $p < 0.001$ , Student's *t*-test). **(E)** Genotyping results from *mIno80<sup>+/-</sup>; p53<sup>+/-</sup>* and *mIno80<sup>+/-</sup>; p53<sup>-/-</sup>* crosses, showing that p53 deletion does not rescue the embryonic lethality characteristic of *mIno80<sup>-/-</sup>* embryos.
